# Supplementary material
Source: publisher figshare collection journal article supplement (https://acs.figshare.com/ndownloader/files/16452626)
Supplement: Supplementary file 1 [file 16452626]

# Supporting Information

## Non-equilibrium Phase Behavior of Immiscible Polymer-Grafted Nanoparticle Blends

Deul Kim<sup>1</sup>, Moon Ryul Sihn<sup>1</sup>, Min-Gi Jeon<sup>1</sup>, Guangcui Yuan<sup>2,3</sup>, Sushil K. Satija<sup>2</sup>, Yeonho Kim<sup>4,\*</sup>, and Jihoon Choi<sup>1,\*</sup>

<sup>1</sup>Department of Materials Science and Engineering, Chungnam National University  
99 Daehak-ro, Yuseong-gu, Daejeon, 34134, Republic of Korea

<sup>2</sup>Center for Neutron Research, National Institute of Standard and Technology, Gaithersburg,  
Maryland 20899, United States

<sup>3</sup>University of Georgetown, Washington D.C. 20057

<sup>4</sup>Electron Microscopy Research Center, Korea Basic Science Institute  
169-148 Gwahak-ro, Yuseong-gu, Daejeon, 34133, Republic of Korea

Corresponding author: Email: [yeonho@kbsi.re.kr](mailto:yeonho@kbsi.re.kr); [jihoonc@cnu.ac.kr](mailto:jihoonc@cnu.ac.kr)

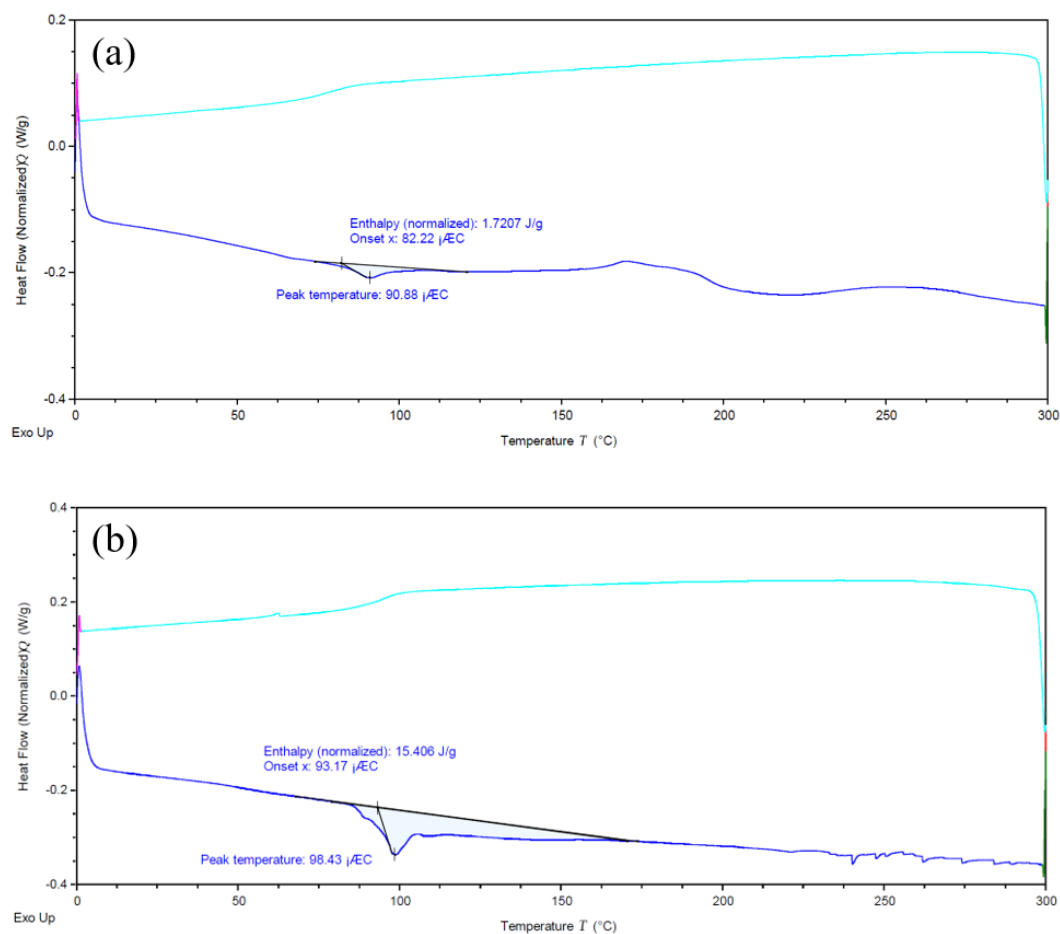

**Figure S1.** Differential scanning calorimetry (DSC) curves of (a) dPS3k-SiO<sub>2</sub> and (b) dPS24k-SiO<sub>2</sub>.

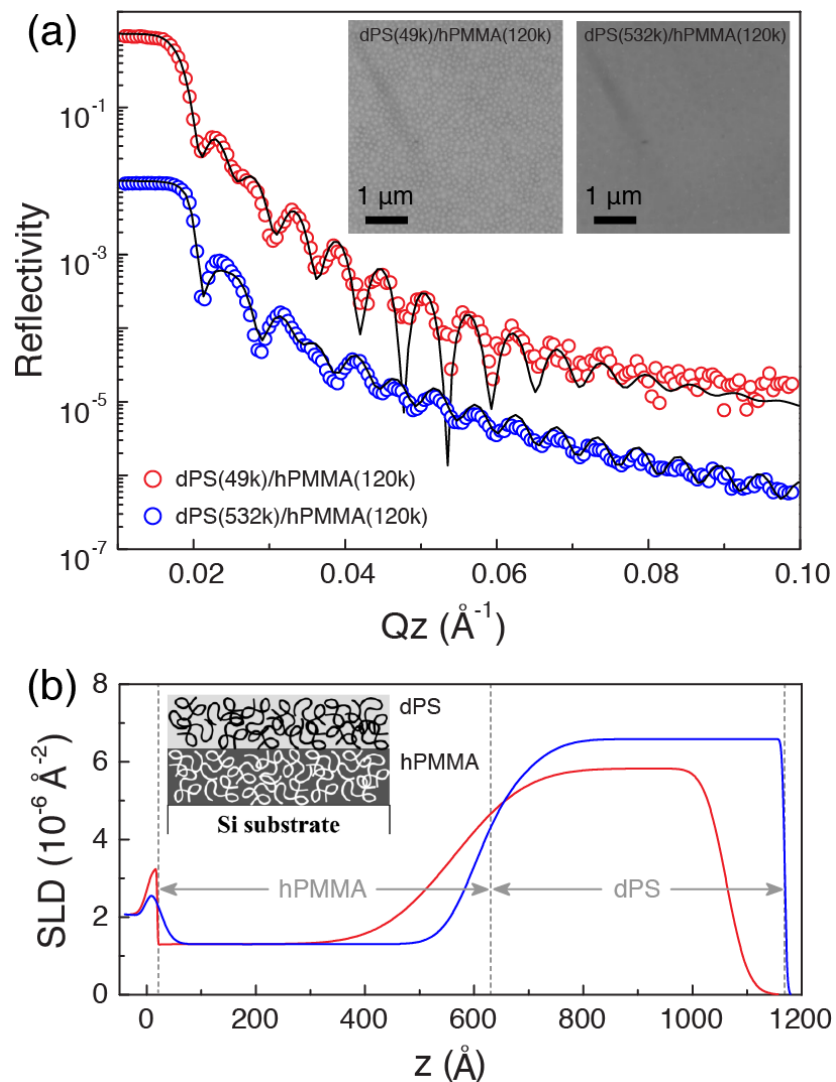

**Figure S2.** (a) NR profiles (best fitting in solid black lines) of the PMMA120k/dPS49k (red circles) and PMMA120k/dPS532k (blue circles) blend films and (b) their corresponding SLD profiles. Inset (b) denotes a formation of bilayer structure where broader interface between dPS and hPMMA domains is observed for low  $M$  (dPS49; red solid line) blend compared to high  $M$  (dPS532k; blue solid line). Insets (a) depict the optical images of the corresponding blend films spin-coated onto Si substrate.

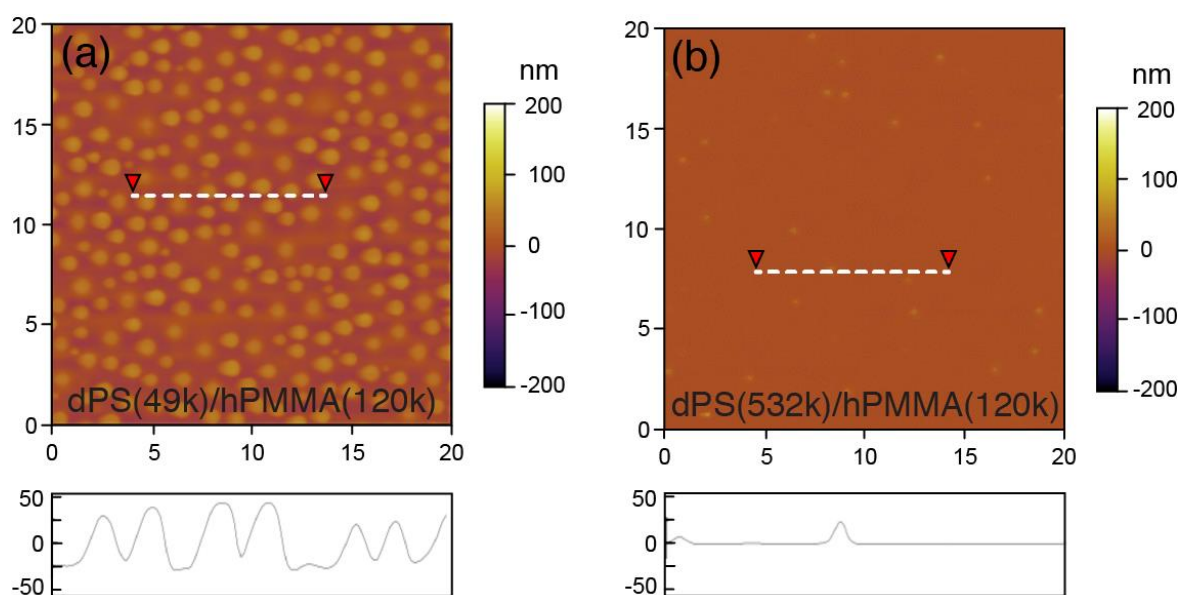

**Figure S3.** AFM height images of the as-cast (a) PMMA120k/dPS49k and (b) PMMA120k/dPS532k blend films. Line scan of height images depicts a formation of droplets with amplitude  $\sim 50$  nm on the surface of low  $M$  (dPS49k) sample. White dashed lines indicate position used for line scans.

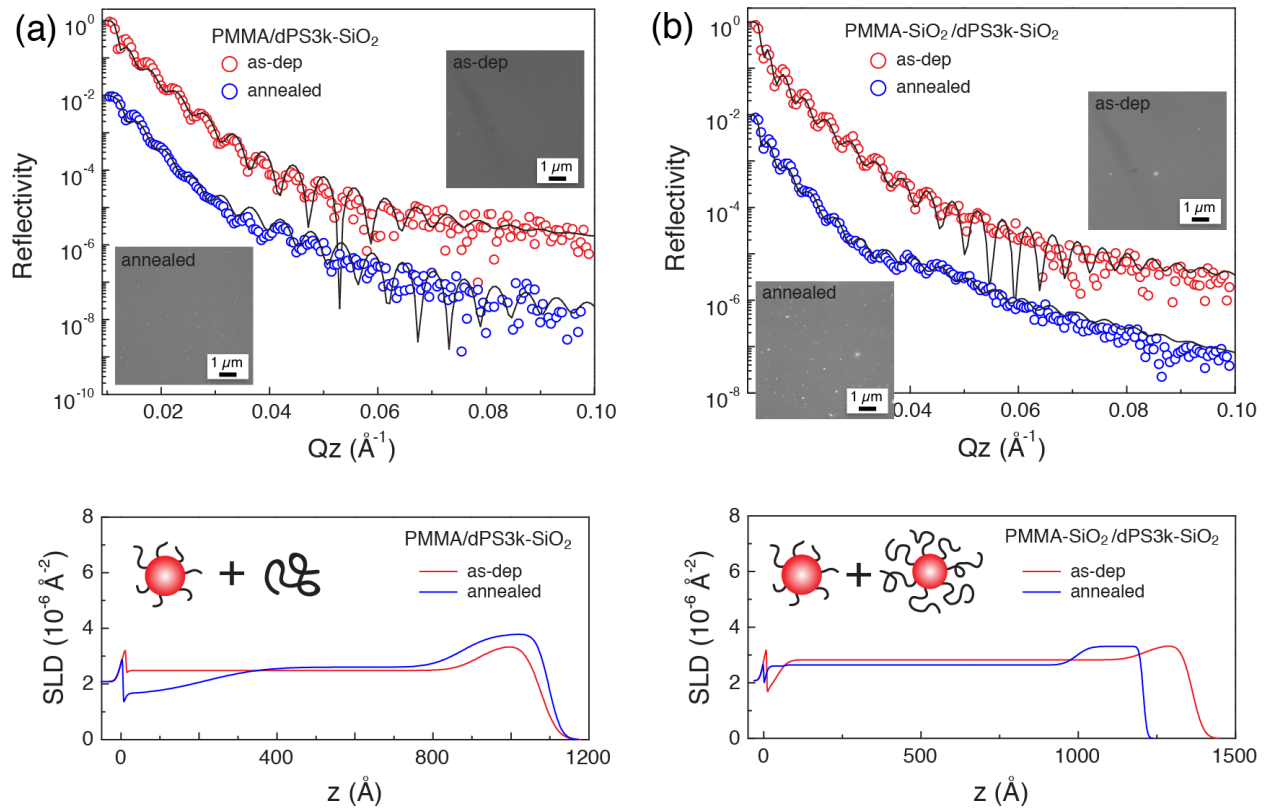

**Figure S4.** NR profiles and the corresponding SLD profiles of (a) PMMA120k/dPS3k-SiO<sub>2</sub> and (b) PMMA-SiO<sub>2</sub>/dPS3k-SiO<sub>2</sub> blend films after thermal annealing for 0 and 24 hours at  $T = 180$  °C. Insets denote the respective optical images.

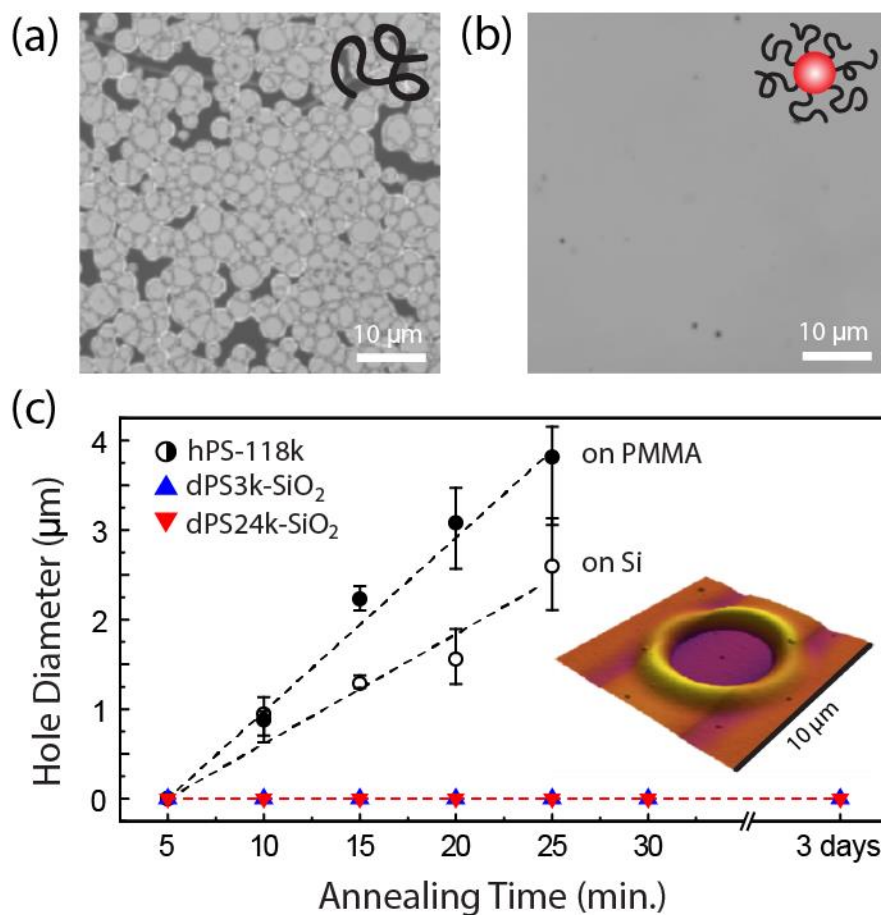

**Figure S5.** Optical images of (a) linear PS (118 kDa) and (b) dPS24k-SiO<sub>2</sub> thin films ( $\sim 100$  nm) floated onto PMMA (120 kDa) coated Si substrate after thermal annealing at  $T = 180$  °C for (a) 25 min and (b) 3 days, respectively. (c) Dewetting hole diameter of the linear PS thin film on PMMA (closed circle) and Si substrate (open circles), and dPS-SiO<sub>2</sub> thin films with  $M = 3$  kDa

(blue triangles) and 24 kDa (red inverted triangles) on PMMA at varying annealing duration (5 min ~ 3 days,  $T = 180^{\circ}\text{C}$ ). Dashed lines are to guide the eye. Inset shows the AFM 3D scan image of a typical dewetting hole ( $t = 25$  min) of PS/PMMA bilayer films.

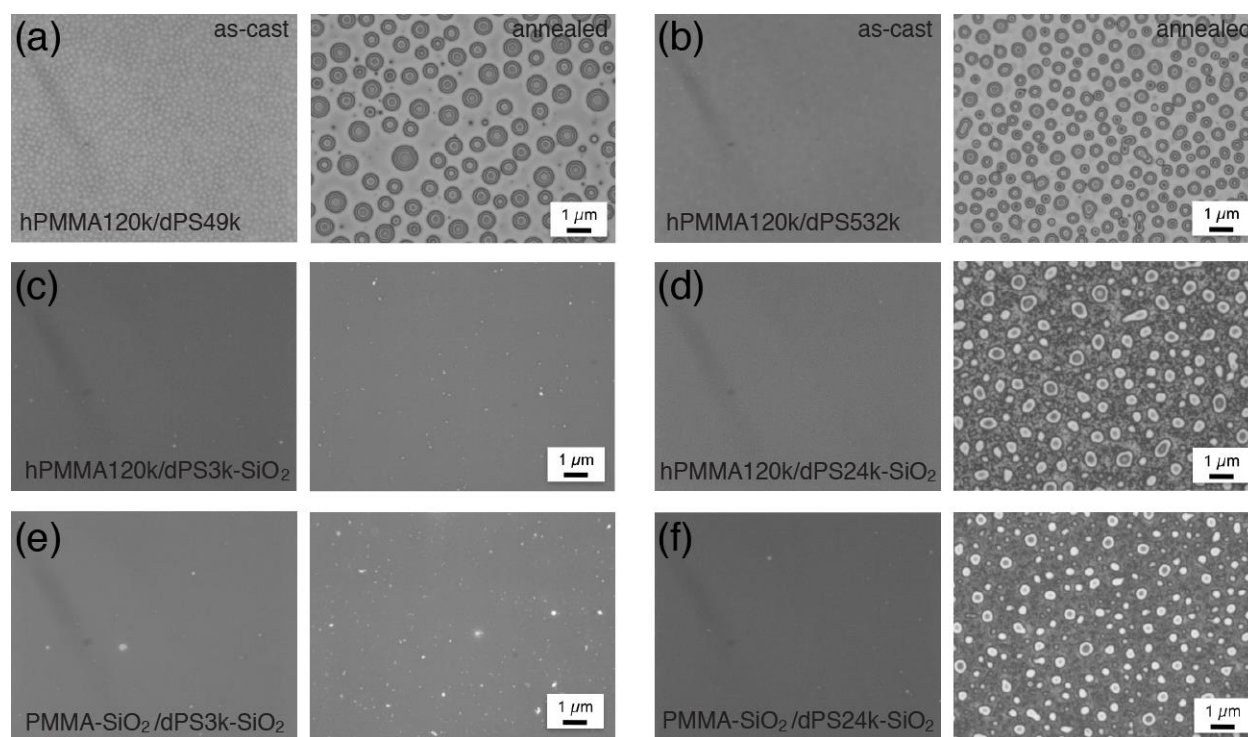

**Figure S6.** Optical images of blend films for (a) PMMA120k/dPS49k, (b) PMMA120k/dPS532k, (c) PMMA120k/dPS3k-SiO<sub>2</sub>, (d), PMMA120k/dPS24k-SiO<sub>2</sub>, (e) PMMA-SiO<sub>2</sub>/dPS3k-SiO<sub>2</sub>, (f) PMMA-SiO<sub>2</sub>/dPS24k-SiO<sub>2</sub> after thermal annealing for 0 and 24

hours at 180°C. Blend films containing dPS3k-SiO<sub>2</sub> are found to be thermally stable compared to the other blends.

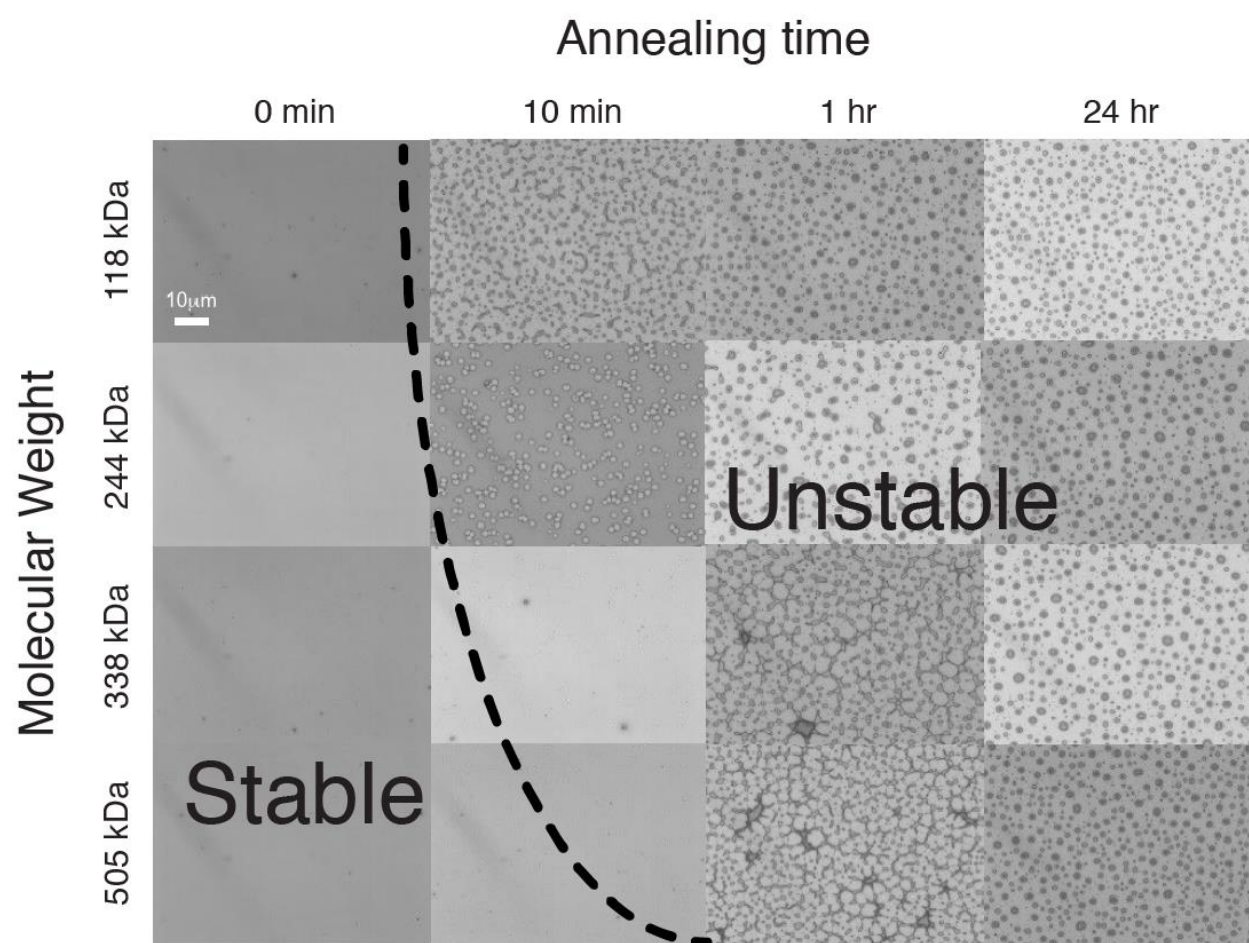



**Figure S7.** Optical images of PS( $M^{\text{PS}}$ )/PMMA( $M^{\text{PMMA}} = 120$  kDa) blend films with various PS molecular weight ( $M^{\text{PS}} = 118, 244, 338, 505$  kDa) after thermal annealing for 0-24 hours at 180°C. Morphological evolution is observed depending on the molecular weight after thermal annealing where wetting and dewetting regions were indicated by dashed line.
